# Supplementary material
Source: PubMed Central journal article supplement (PMC8033516)

## Expanded View Figures

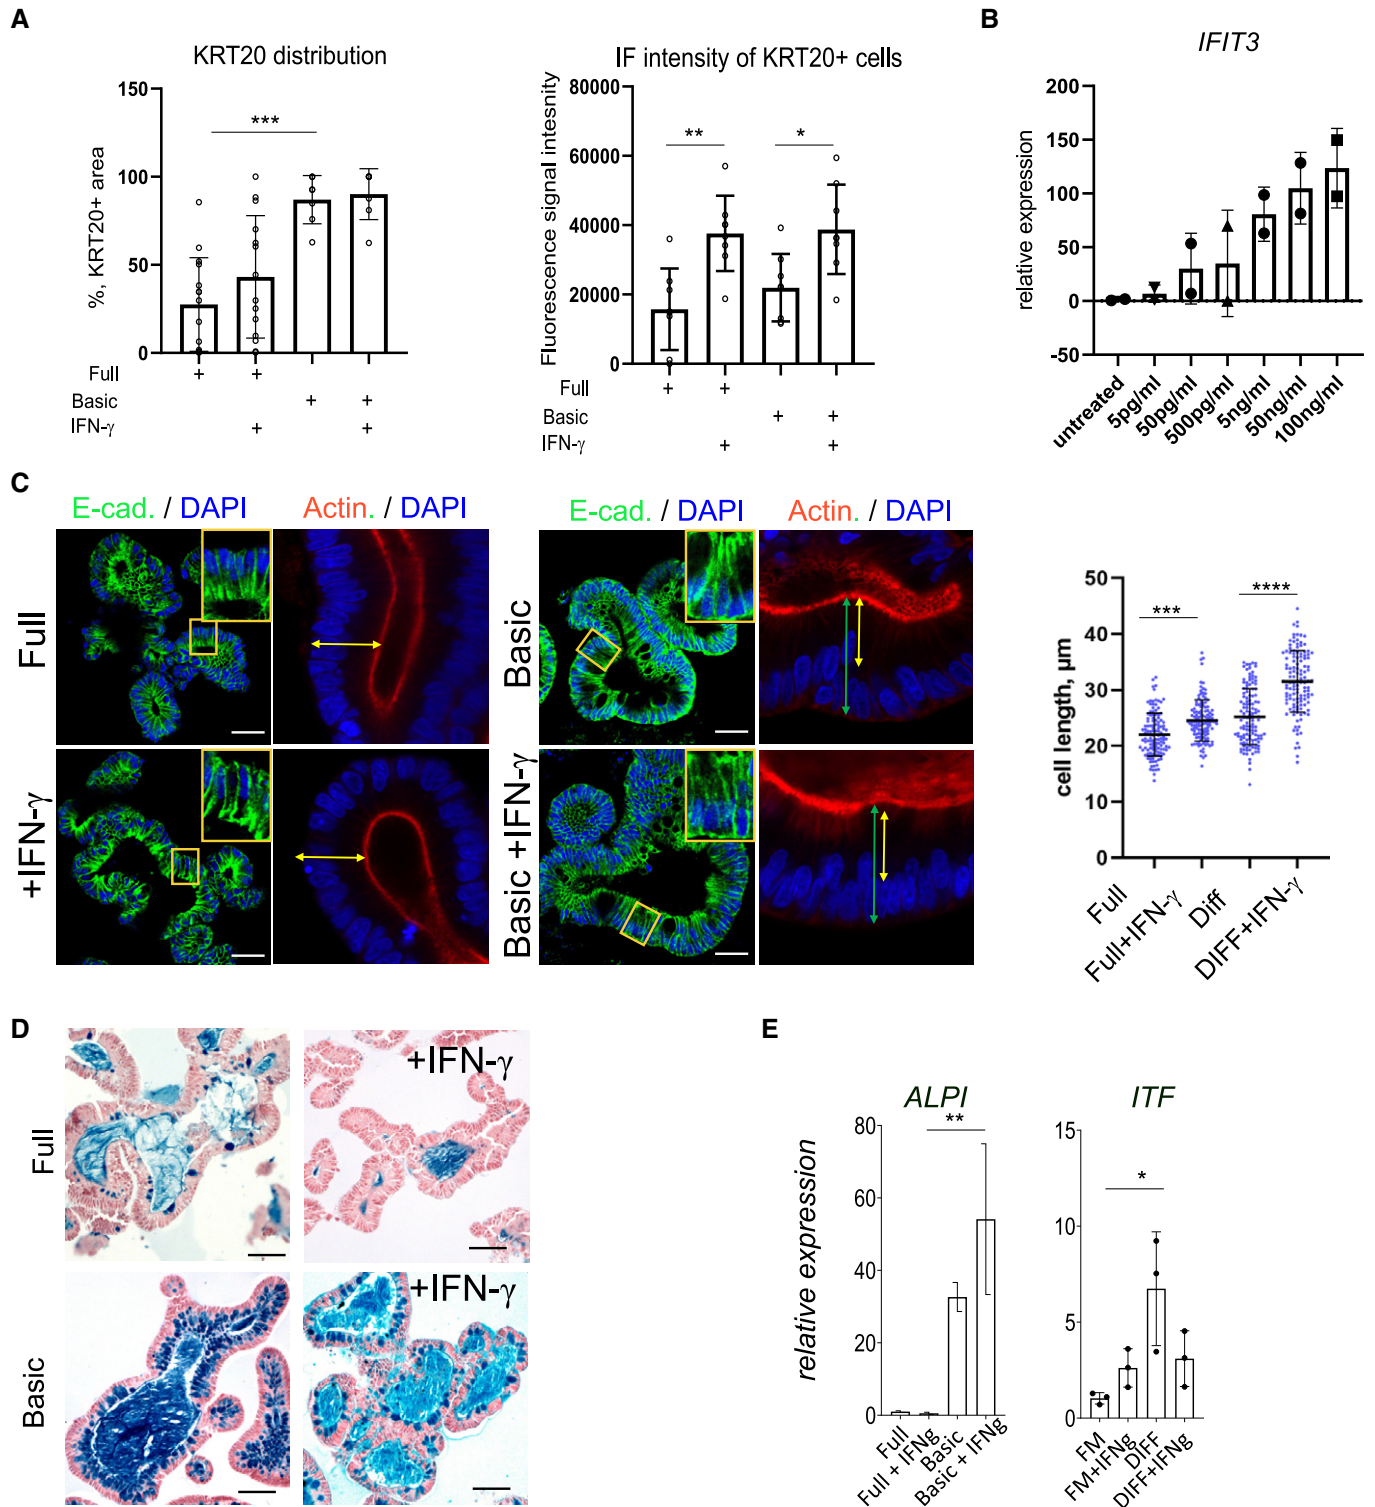

Figure EV1.

**Figure EV1. Differentiation of colon organoids after IFN- $\gamma$  treatment.**

- A Quantification of KRT20 immunofluorescence of human colon organoids cultured either in full or basic medium and treated with IFN- $\gamma$ . Left: relative abundance of KRT20<sup>+</sup> cells per organoid; Right: Fluorescence intensity of KRT20<sup>+</sup> cells, indicating an increase in KRT20 expression in response to IFN- $\gamma$ . Data are presented as mean  $\pm$  SD, \*:  $P \leq 0.05$ , \*\*:  $P \leq 0.001$ , \*\*\*:  $P \leq 0.0001$ , as determined by one-way ANOVA, followed by Tukey's multiple comparisons test (more details see Appendix Table S2).
- B Measurement of IFN- $\gamma$  responsiveness by qRT-PCR for the IFN- $\gamma$  target gene *IFIT3* at concentrations from 5 pg/ml to 100 ng/ml.
- C Immunofluorescence staining for E-cadherin (green) and actin (red) of organoids grown in full medium (left) or basic medium (right) and additionally treated with IFN- $\gamma$  (lower), indicating increased columnar cell height as a feature of differentiation upon IFN- $\gamma$  treatment. Scale bar: 25  $\mu$ m. Quantification of cell length on the right. Data are presented as mean  $\pm$  SD, \*:  $P \leq 0.05$ , \*\*:  $P \leq 0.001$ , \*\*\*:  $P \leq 0.0001$ , as determined by one-way ANOVA, followed by Tukey's multiple comparison test (more details see Appendix Table S2).
- D Alcian blue–nuclear fast red staining of human colon organoids cultured in full medium (upper panel) or differentiation medium (lower panel), with or without IFN- $\gamma$  treatment to visualize goblet cells. Scale bar: 50  $\mu$ m.
- E Comparison of the differentiation markers ALPI (enterocytes, left) and ITF (goblet cells, right) in organoids grown in full medium or in basic medium and either untreated or treated with IFN- $\gamma$ . Data are presented as mean  $\pm$  SD, \*:  $P \leq 0.05$ , \*\*:  $P \leq 0.001$ , \*\*\*:  $P \leq 0.0001$ , as determined by one-way ANOVA followed by Tukey's multiple comparison test.

**Figure EV2. Interferon- $\gamma$  (IFN- $\gamma$ ) induces differentiation into enterocytes and upregulates *Ace2* expression in murine colon organoids.**

- A Immunofluorescence for *Ace2* (red) and *Krt20* (green) in murine colon: pronounced expression of *Ace2* in terminally differentiated surface enterocytes at the top of the colon crypt. Magnifications of single fluorescence channels below. Scale bar: 50  $\mu$ m.
- B t-sne plot for selected genes from single-cell RNAseq of mouse colon revealing expression of *Krt20* in enterocytes (*Car4*<sup>+</sup> population) and partially in goblet cells (*Tff3*<sup>+</sup> population). Interferon receptors (*Ifngr1/2*) show rather broad expression in the mouse colon epithelium.
- C 3-dimensional organoid culture from mouse colon epithelium using different culture conditions; upper: full medium (Full), middle: upon Wnt withdrawal (-Wnt, -CHIR (-WC)), lower: FM supplemented with IFN- $\gamma$  (Ifn- $\gamma$ ). Immunofluorescence for *Krt20* (green) middle panel, and immunofluorescence for E-cadherin (green), third from right, and phalloidin staining for actin (right) Scale bar: 50  $\mu$ m. Magnification of IFN- $\gamma$ -treated organoids stained for *Krt20* and E-cadherin below.
- D Western blot of protein lysates from mouse colon organoids cultured in full medium or treated with IFN- $\gamma$ , showing increase of *Krt20* protein upon IFN- $\gamma$  treatment. Tubulin served as loading control.
- E Optical section of whole mount immunofluorescence of 2 h EdU incorporation (red) in organoids cultured in full medium, -WC medium or treated with IFN- $\gamma$  to label proliferating cells in s-phase. Right: quantification of EdU-positive nuclei as percentage of all nuclei per organoid. Data are presented as mean  $\pm$  SD, \*:  $P \leq 0.05$ , \*\*:  $P \leq 0.001$ , \*\*\*:  $P \leq 0.0001$ , as determined by one-way ANOVA, followed by Tukey's multiple comparison test (more details see Appendix Table S2).
- F Comparison of *Krt20* mRNA expression of control (full medium) and IFN- $\gamma$ -treated organoids, as determined by qPCR. Data are presented as mean  $\pm$  SD \*:  $P \leq 0.05$ , \*\*:  $P \leq 0.001$ , as determined by Student's t-test (more details see Appendix Table S2).

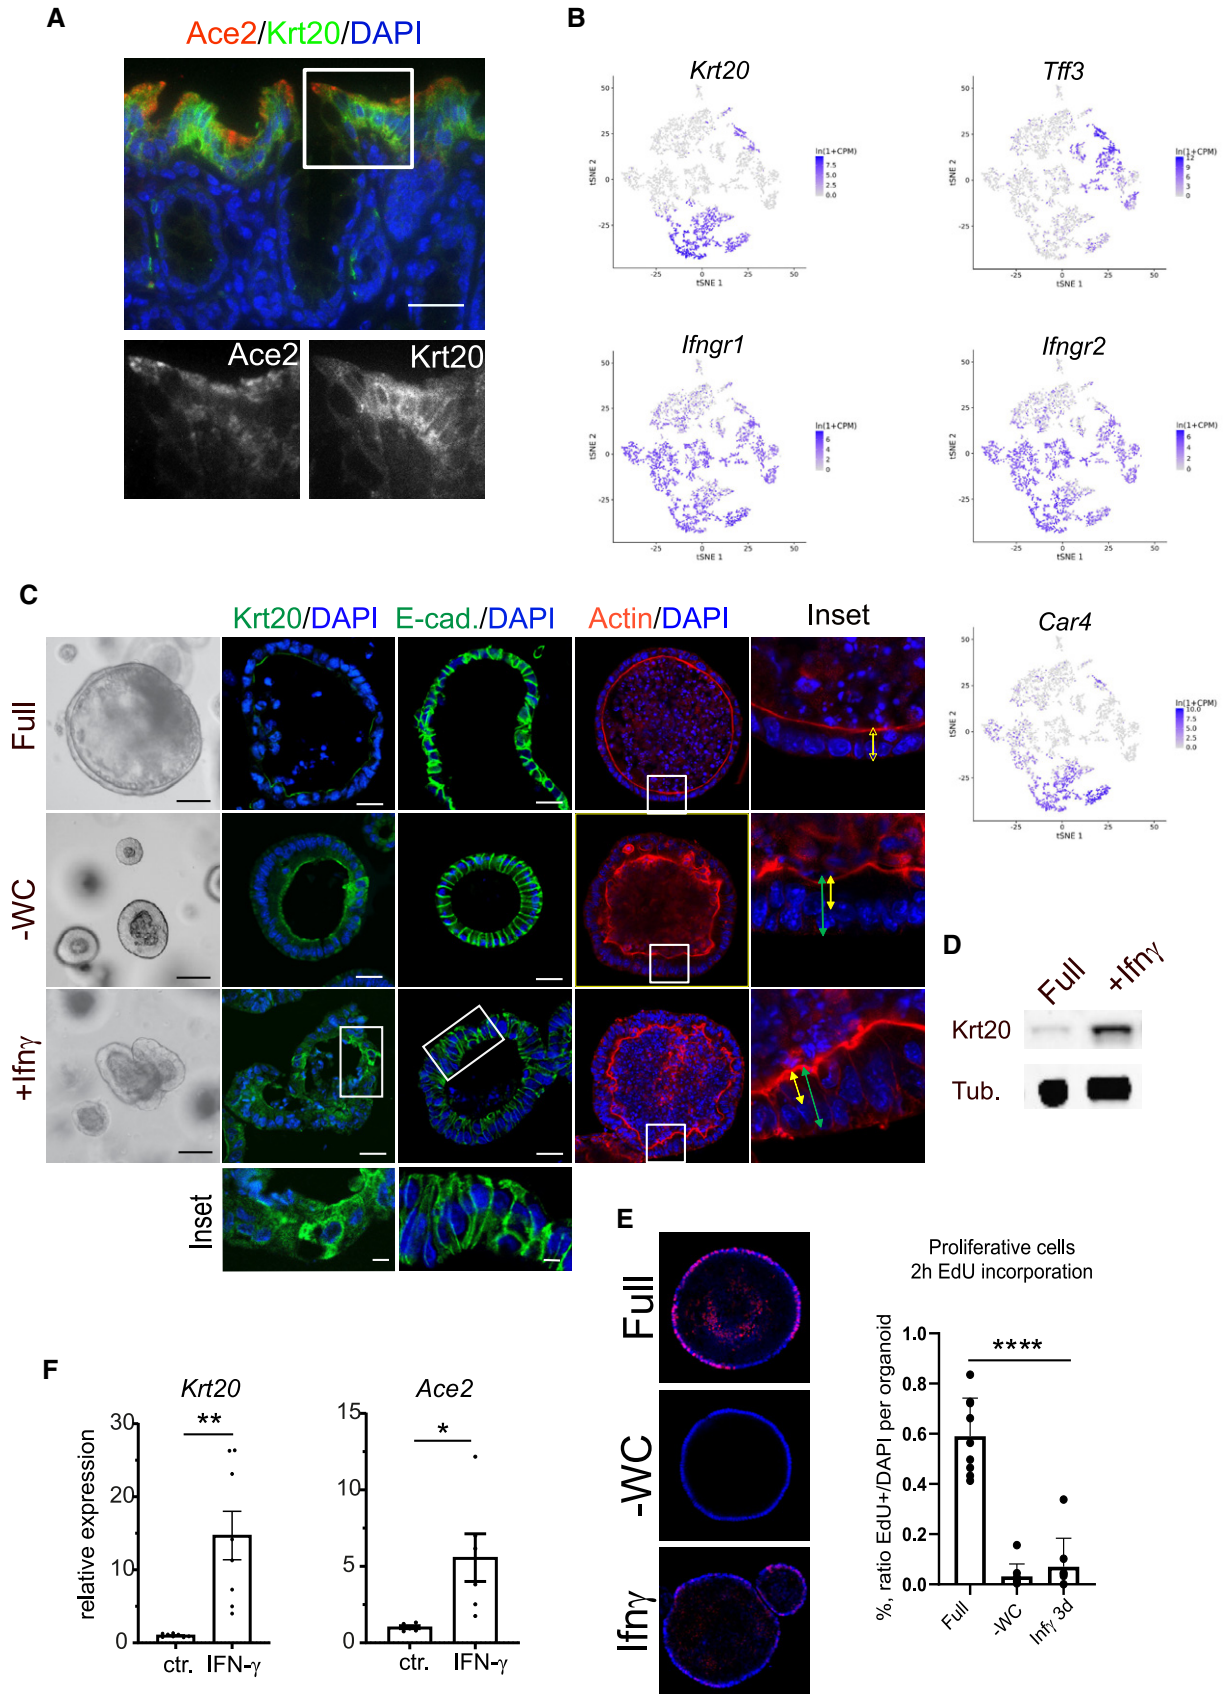

Figure EV2.

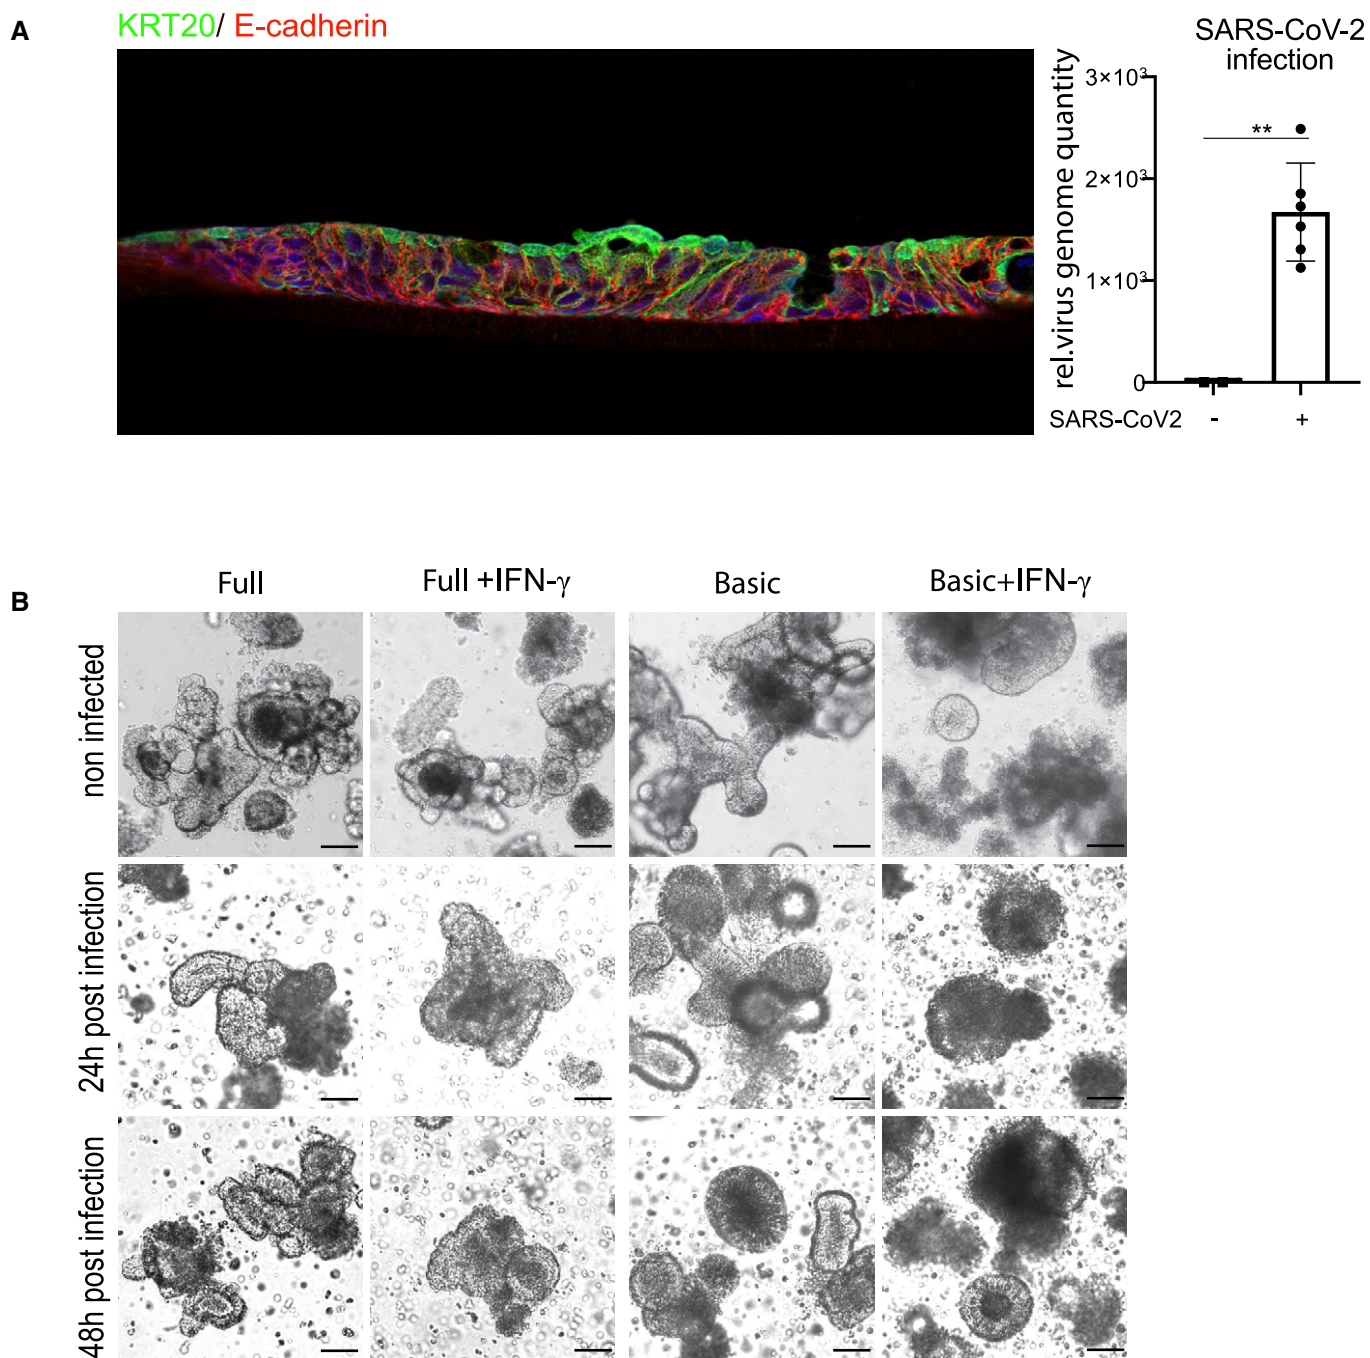

**Figure EV3. Infection of air–liquid interface culture and tracking of SARS-CoV-2-infected organoids.**

**A** Air–liquid interface culture of human colonocytes. Immunofluorescence for KRT20 (green) and E-cadherin (red), indicating differentiated epithelial cells. Right: qPCR data displaying the relative virus load of SARS-CoV-2 measured by viral genome quantity in ALI cells, normalized to GAPDH. Data are presented as mean  $\pm$  SD, \*\*:  $P \leq 0.01$ , as determined by Student's *t*-test (more details see Appendix Table S2).

**B** Bright field images of human colon organoids cultured in full medium (left), full medium + IFN- $\gamma$  (second right), differentiated (third right) and differentiated + IFN- $\gamma$  (far right), either uninfected (upper panel), or after 24 h (middle panel) or 48 h (lower panel) post-infection with SARS-CoV-2. Scale bar: 50  $\mu$ m.



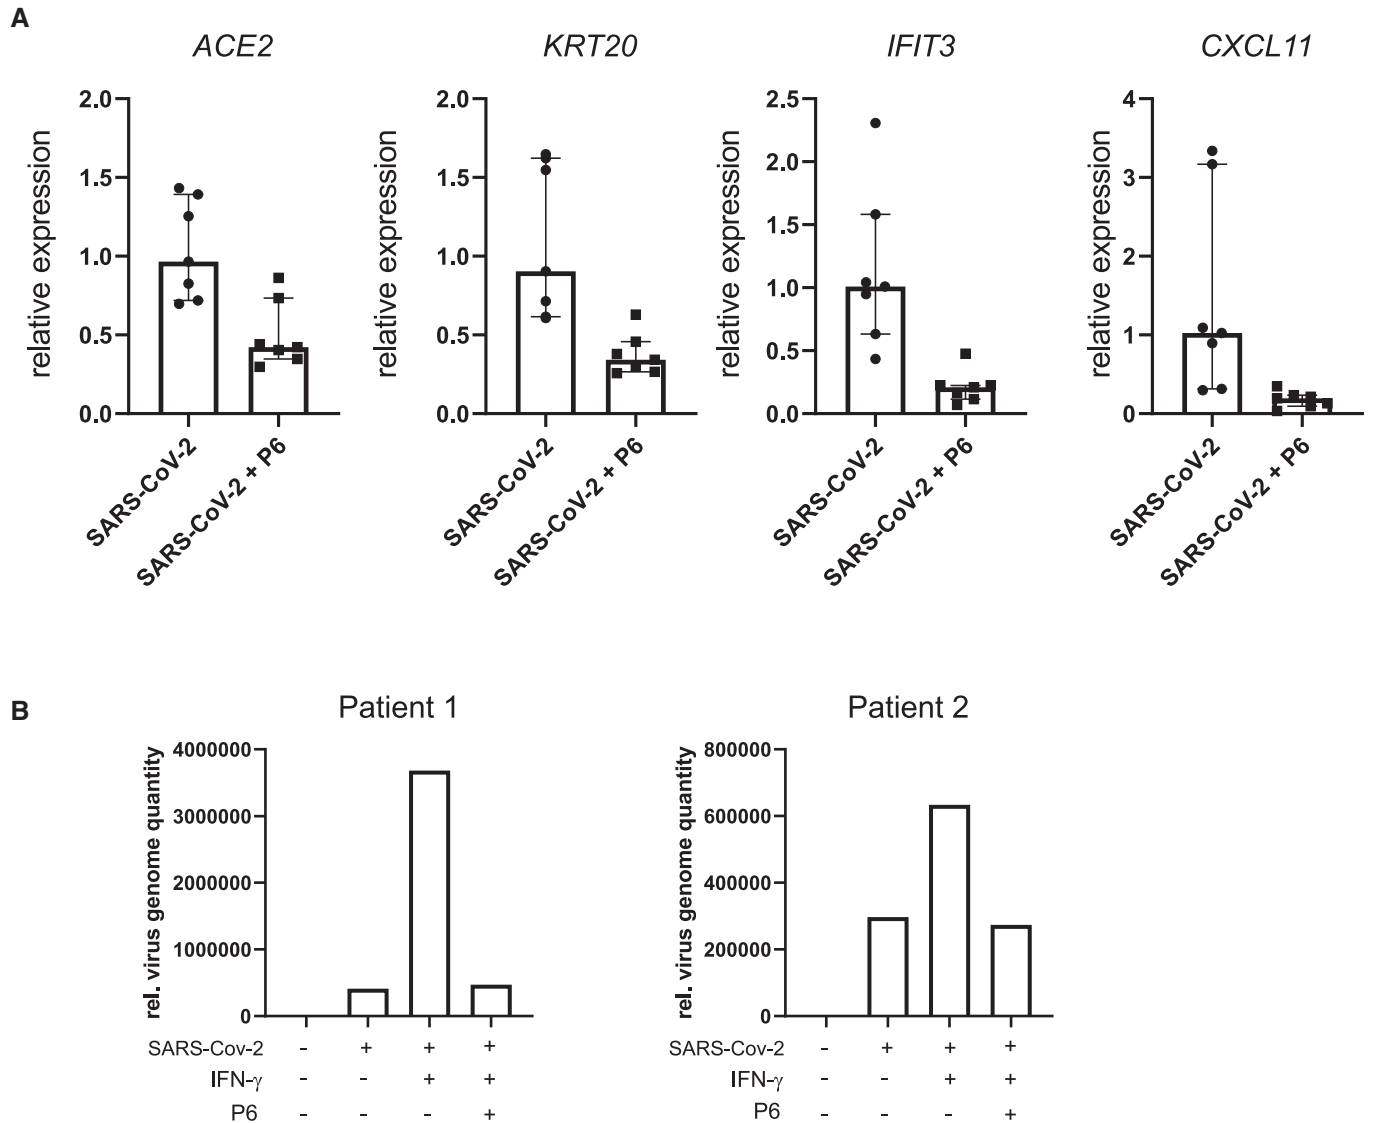

Supplement: EMMM-13-e13191-s003.pdf [file EMMM-13-e13191-s003.pdf]
