# Supplementary material
Source: PubMed Central journal article supplement (PMC8033516)
Supplement: EMMM-13-e13191-s002.pdf [file EMMM-13-e13191-s002.pdf]

## Appendix

### Table of content:

- 1) Appendix Table S1: List of genes with the highest fold-change increase upon infection with SARS-CoV-2 that are also induced by IFN- $\gamma$  treatment
- 2) Appendix Table S2: overview of exact p-values and statistical tests

1) Appendix Table S1

| GeneSymbol | GeneName                                                                       | Uninfected vs. Infected Fold Change | Uninfected vs. Infected adj.Pval | Untreated vs. IFN-γ treated | Untreated vs. IFN-γ treated.adj.Pval |
|------------|--------------------------------------------------------------------------------|-------------------------------------|----------------------------------|-----------------------------|--------------------------------------|
| IFI44L     | interferon induced protein 44 like                                             | 53.09                               | 5.30E-12                         | 41.98                       | 4.90E-12                             |
| HRASLS2    | HRAS like suppressor 2                                                         | 42.27                               | 1.72E-12                         | 4.14                        | 4.05E-09                             |
| FOLR2      | folate receptor beta                                                           | 42.11                               | 1.93E-08                         | 1.64                        | 0.167484053                          |
| RSAD2      | radical S-adenosyl methionine domain containing 2                              | 39.38                               | 4.04E-09                         | 13.07                       | 1.27E-07                             |
| CXCL10     | C-X-C motif chemokine ligand 10                                                | 37.01                               | 1.72E-12                         | 63.47                       | 1.28E-13                             |
| HERC5      | HECT and RLD domain containing E3 ubiquitin protein ligase 5                   | 36.88                               | 1.74E-09                         | 2.05                        | 0.005881914                          |
| MX2        | MX dynamin like GTPase 2                                                       | 31.78                               | 1.72E-12                         | 4.70                        | 6.16E-10                             |
| EPSTI1     | epithelial stromal interaction 1                                               | 30.52                               | 9.02E-12                         | 47.99                       | 1.81E-12                             |
| IFI6       | interferon alpha inducible protein 6                                           | 29.20                               | 1.74E-11                         | 4.18                        | 4.74E-08                             |
| XAF1       | XIAP associated factor 1                                                       | 28.27                               | 2.00E-10                         | 38.85                       | 5.22E-11                             |
| BST2       | bone marrow stromal cell antigen 2                                             | 26.47                               | 4.01E-11                         | 19.49                       | 5.40E-11                             |
| CMPK2      | cytidine/uridine monophosphate kinase 2                                        | 25.81                               | 5.92E-12                         | 7.61                        | 2.99E-10                             |
| XAF1       | XIAP associated factor 1                                                       | 25.27                               | 5.28E-09                         | 40.52                       | 1.05E-09                             |
| IFI44      | interferon induced protein 44                                                  | 23.11                               | 2.68E-12                         | 17.21                       | 2.49E-12                             |
| CXCL11     | C-X-C motif chemokine ligand 11                                                | 22.68                               | 3.83E-12                         | 63.25                       | 1.28E-13                             |
| IFIT2      | interferon induced protein with tetratricopeptide repeats 2                    | 20.65                               | 4.62E-10                         | 5.19                        | 1.65E-07                             |
| OAS2       | 2'-5'-oligoadenylate synthetase 2                                              | 20.51                               | 1.41E-09                         | 6.34                        | 1.63E-07                             |
| ISG15      | ISG15 ubiquitin-like modifier                                                  | 20.35                               | 9.16E-10                         | 3.73                        | 3.26E-06                             |
| MX1        | MX dynamin like GTPase 1                                                       | 20.18                               | 1.22E-10                         | 6.40                        | 1.05E-08                             |
| IFIT3      | interferon induced protein with tetratricopeptide repeats 3                    | 19.94                               | 6.95E-12                         | 11.86                       | 2.29E-11                             |
| FRY        | FRY microtubule binding protein                                                | -7.72                               | 3.84E-08                         | -1.90                       | 0.002295319                          |
| G0S2       | G0/G1 switch 2                                                                 | -7.80                               | 2.78E-10                         | -4.85                       | 2.70E-09                             |
| LAMB2P1    | laminin subunit beta 2 pseudogene 1                                            | -7.94                               | 8.11E-09                         | -1.70                       | 0.003174398                          |
| WFDC2      | WAP four-disulfide core domain 2                                               | -7.94                               | 1.12E-07                         | -6.79                       | 2.51E-07                             |
| CREG2      | cellular repressor of E1A stimulated genes 2                                   | -8.05                               | 1.91E-05                         | -10.75                      | 6.88E-06                             |
| ELFN2      | extracellular leucine rich repeat and fibronectin type III domain containing 2 | -8.25                               | 4.13E-07                         | -4.33                       | 1.76E-05                             |
| CXCR4      | C-X-C motif chemokine receptor 4                                               | -9.36                               | 7.61E-07                         | -5.10                       | 2.04E-05                             |
| PPP1R3C    | protein phosphatase 1 regulatory subunit 3C                                    | -9.65                               | 7.03E-08                         | -4.44                       | 4.96E-06                             |
| KLK8       | kallikrein related peptidase 8                                                 | -9.74                               | 1.11E-09                         | -2.09                       | 7.31E-05                             |
| S1PR4      | sphingosine-1-phosphate receptor 4                                             | -9.96                               | 1.91E-09                         | -3.51                       | 7.17E-07                             |
| PCP4L1     | Purkinje cell protein 4 like 1                                                 | -10.12                              | 4.29E-07                         | -2.73                       | 0.001268127                          |
| HLA-DRB5   | major histocompatibility complex, class II, DR beta 5                          | -10.24                              | 6.12E-06                         | 51.00                       | 3.42E-08                             |
| SLC11A2    | solute carrier family 11 member 2                                              | -10.39                              | 1.74E-09                         | -1.57                       | 0.007465497                          |
| CAPN14     | calpain 14                                                                     | -10.40                              | 1.16E-08                         | -1.98                       | 0.001537628                          |
| LGALS14    | galectin 14                                                                    | -11.46                              | 1.41E-08                         | 3.47                        | 1.19E-05                             |
| TNFSF4     | TNF superfamily member 4                                                       | -12.12                              | 9.70E-09                         | -3.28                       | 1.65E-05                             |
| DIRAS2     | DIRAS family GTPase 2                                                          | -12.39                              | 1.85E-05                         | -13.08                      | 1.93E-05                             |
| PRDM16     | PR/SET domain 16                                                               | -14.33                              | 4.22E-07                         | -2.25                       | 0.015760879                          |
| LEMD1      | LEM domain containing 1                                                        | -20.56                              | 4.31E-09                         | 2.33                        | 0.000919216                          |
| KLK7       | kallikrein related peptidase 7                                                 | -21.96                              | 2.43E-11                         | -3.23                       | 2.34E-07                             |

Appendix Table S1: Twenty genes with the highest change of expression (increase and decrease) upon SARS-CoV-2 infection.

## 2) Appendix Table S2: Exact p-values

**Fig 1E**

| Tukey's multiple comparisons test | Significant? | Summary | Adjusted P Value |
|-----------------------------------|--------------|---------|------------------|
| FM vs. FM+IFN                     | No           | ns      | 0,9863           |
| FM vs. DIFF                       | No           | ns      | 0,9723           |
| FM vs. DIFF+IFN                   | Yes          | ***     | 0,0009           |
| FM+IFN vs. DIFF                   | No           | ns      | 0,9997           |
| FM+IFN vs. DIFF+IFN               | Yes          | **      | 0,0013           |
| DIFF vs. DIFF+IFN                 | Yes          | **      | 0,0015           |

n=3

**Fig 1F**

| Tukey's multiple comparisons test | Significant? | Summary | Adjusted P Value |
|-----------------------------------|--------------|---------|------------------|
| FM vs. FM+IFNg                    | No           | ns      | >0,9999          |
| FM vs. DIFF                       | Yes          | ***     | 0,0003           |
| FM vs. DIFF+IFNg                  | No           | ns      | 0,0619           |
| FM+IFNg vs. DIFF                  | Yes          | ***     | 0,0003           |
| FM+IFNg vs. DIFF+IFNg             | No           | ns      | 0,063            |
| DIFF vs. DIFF+IFNg                | Yes          | **      | 0,0094           |

n=3

**Fig 1G**

| Tukey's multiple comparisons test | Significant? | Summary | Adjusted P Value |
|-----------------------------------|--------------|---------|------------------|
| FM vs. FM + IFN                   | No           | ns      | 0,244            |
| FM vs. Diff                       | Yes          | ****    | <0,0001          |
| FM vs. DIF + IFN                  | Yes          | **      | 0,0032           |
| FM + IFN vs. Diff                 | Yes          | ****    | <0,0001          |
| FM + IFN vs. DIF + IFN            | Yes          | ***     | 0,0004           |
| Diff vs. DIF + IFN                | Yes          | **      | 0,0047           |

n=3

**Fig 1H**

| Tukey's multiple comparisons test | Significant? | Summary | Adjusted P Value |
|-----------------------------------|--------------|---------|------------------|
| FM vs. FM+IFN                     | Yes          | ****    | <0,0001          |
| FM vs. DIFF                       | Yes          | ****    | <0,0001          |
| FM vs. DIFF+IFN                   | Yes          | ****    | <0,0001          |
| FM+IFN vs. DIFF                   | Yes          | *       | 0,0483           |
| FM+IFN vs. DIFF+IFN               | No           | ns      | 0,0501           |
| DIFF vs. DIFF+IFN                 | No           | ns      | >0,9999          |

n=3

**Fig 1I**

| Tukey's multiple comparisons test | Significant? | Summary | Adjusted P Value |
|-----------------------------------|--------------|---------|------------------|
| FM vs. FM+IFN                     | No           | ns      | 0,9998           |
| FM vs. DIFF                       | No           | ns      | 0,9288           |
| FM vs. DIFF+IFN                   | Yes          | *       | 0,0229           |
| FM+IFN vs. DIFF                   | No           | ns      | 0,9502           |
| FM+IFN vs. DIFF+IFN               | Yes          | *       | 0,0254           |
| DIFF vs. DIFF+IFN                 | No           | ns      | 0,0529           |

n=3

**Fig 2B**

|                                     |            |        |
|-------------------------------------|------------|--------|
| Unpaired t test                     |            |        |
| P value                             |            | 0,0202 |
| P value summary                     | *          |        |
| Significantly different (P < 0.05)? | Yes        |        |
| One- or two-tailed P value?         | Two-tailed |        |

n=6

**Fig 2C**

|                                     |            |        |
|-------------------------------------|------------|--------|
| Unpaired t test                     |            |        |
| P value                             |            | 0,0322 |
| P value summary                     | *          |        |
| Significantly different (P < 0.05)? | Yes        |        |
| One- or two-tailed P value?         | Two-tailed |        |

n=9

**Fig 2D**

|                                     |            |        |
|-------------------------------------|------------|--------|
| Unpaired t test                     |            |        |
| P value                             |            | 0,0133 |
| P value summary                     | *          |        |
| Significantly different (P < 0.05)? | Yes        |        |
| One- or two-tailed P value?         | Two-tailed |        |

n=4

**Fig 2E**

|                                     |            |        |
|-------------------------------------|------------|--------|
| Unpaired t test                     |            |        |
| P value                             |            | 0,0105 |
| P value summary                     | *          |        |
| Significantly different (P < 0.05)? | Yes        |        |
| One- or two-tailed P value?         | Two-tailed |        |

n=4

**Fig 2F right**

| Tukey's multiple comparisons test | Significant? | Summary | Adjusted P Value |
|-----------------------------------|--------------|---------|------------------|
| DIFF vs. DIFF+IFN                 | Yes          | *       | 0,0102           |
| DIFF vs. DIFF 24h                 | No           | ns      | 0,9629           |
| DIFF vs. DIFF +IFN 24h            | No           | ns      | 0,9747           |
| DIFF+IFN vs. DIFF 24h             | Yes          | *       | 0,0135           |
| DIFF+IFN vs. DIFF +IFN 24h        | Yes          | *       | 0,0149           |
| DIFF 24h vs. DIFF +IFN 24h        | No           | ns      | >0,9999          |

n=4

**Fig 2F left**

| Tukey's multiple comparisons test | Significant? | Summary | Adjusted P Value |
|-----------------------------------|--------------|---------|------------------|
| FM vs. FM +IFN                    | No           | ns      | 0,0718           |
| FM vs. FM 24h                     | No           | ns      | 0,9526           |
| FM vs. FM+IFN 24h                 | No           | ns      | 0,9806           |
| FM +IFN vs. FM 24h                | No           | ns      | 0,4904           |
| FM +IFN vs. FM+IFN 24h            | No           | ns      | 0,5241           |
| FM 24h vs. FM+IFN 24h             | No           | ns      | 0,9998           |

n=8

**Fig 2H**

| Tukey's multiple comparisons test | Significant? | Summary | Adjusted P Value |
|-----------------------------------|--------------|---------|------------------|
| Diff vs. DIFF+IFN                 | Yes          | *       | 0,0243           |
| Diff vs. FM                       | No           | ns      | 0,7419           |
| Diff vs. FM+IFNg                  | No           | ns      | 0,81             |
| DIFF+IFN vs. FM                   | Yes          | **      | 0,0042           |
| DIFF+IFN vs. FM+IFNg              | Yes          | **      | 0,0028           |
| FM vs. FM+IFNg                    | No           | ns      | 0,9969           |

**Fig 3E**

|                                     |            |
|-------------------------------------|------------|
| Unpaired t test                     |            |
| P value                             | <0,0001    |
| P value summary                     | ****       |
| Significantly different (P < 0.05)? | Yes        |
| One- or two-tailed P value?         | Two-tailed |
| n=8                                 |            |

**Fig 3F**

|                                     |            |
|-------------------------------------|------------|
| CXCL11                              |            |
| Unpaired t test                     |            |
| P value                             | 0,0085     |
| P value summary                     | **         |
| Significantly different (P < 0.05)? | Yes        |
| One- or two-tailed P value?         | Two-tailed |
| n=3                                 |            |

|                                     |            |
|-------------------------------------|------------|
| IFIT3                               |            |
| Unpaired t test                     |            |
| P value                             | 0,0232     |
| P value summary                     | *          |
| Significantly different (P < 0.05)? | Yes        |
| One- or two-tailed P value?         | Two-tailed |
| n=3                                 |            |

|                                     |            |
|-------------------------------------|------------|
| Krt20                               |            |
| Unpaired t test                     |            |
| P value                             | 0,2386     |
| P value summary                     | ns         |
| Significantly different (P < 0.05)? | No         |
| One- or two-tailed P value?         | Two-tailed |
| n=3                                 |            |

|                                     |            |
|-------------------------------------|------------|
| ACE2                                |            |
| Unpaired t test                     |            |
| P value                             | 0,0437     |
| P value summary                     | *          |
| Significantly different (P < 0.05)? | Yes        |
| One- or two-tailed P value?         | Two-tailed |
| n=3                                 |            |

**EV1A left**

| Tukey's multiple comparisons test | Significant? | Summary | Adjusted P Value |
|-----------------------------------|--------------|---------|------------------|
| FM vs. Diff                       | Yes          | ***     | 0,0001           |
| FM vs. DIFF+IFN                   | Yes          | ****    | <0,0001          |
| FM vs. FM+IFN                     | No           | ns      | 0,4063           |
| Diff vs. DIFF+IFN                 | No           | ns      | 0,9962           |
| Diff vs. FM+IFN                   | Yes          | **      | 0,0056           |
| DIFF+IFN vs. FM+IFN               | Yes          | **      | 0,0027           |

DIFF n=7 and FM n=14

**EV1A right**

| Tukey's multiple comparisons test | Significant? | Summary | Adjusted P Value |
|-----------------------------------|--------------|---------|------------------|
| FM vs. FM + IFN                   | Yes          | **      | 0,0033           |
| FM vs. Diff                       | No           | ns      | 0,6959           |
| FM vs. DIF + IFN                  | Yes          | **      | 0,002            |
| FM + IFN vs. Diff                 | Yes          | *       | 0,0475           |
| FM + IFN vs. DIF + IFN            | No           | ns      | 0,9969           |
| Diff vs. DIF + IFN                | Yes          | *       | 0,03             |

n=8

**EV1B**

|                                           |                   |
|-------------------------------------------|-------------------|
| ANOVA summary                             |                   |
| F                                         | 4,905             |
| P value                                   | 0,0279            |
| P value summary                           | *                 |
| Significant diff. among means (P < 0.05)? | Yes               |
| R squared                                 | 0,8078            |
| Brown-Forsythe test                       |                   |
| F (DFn, DFd)                              | 7,966e+031 (6, 7) |
| P value                                   | <0,0001           |
| P value summary                           | ****              |

n=2

**EV1C**

| Tukey's multiple comparisons test | Significant? | Summary | Adjusted P Value |
|-----------------------------------|--------------|---------|------------------|
| FM vs. FM+IFNg                    | Yes          | ****    | <0,0001          |
| FM vs. DIFF+IFN                   | Yes          | ****    | <0,0001          |
| FM vs. Diff                       | Yes          | ****    | <0,0001          |
| FM+IFNg vs. DIFF+IFN              | Yes          | ****    | <0,0001          |
| FM+IFNg vs. Diff                  | No           | ns      | 0,697            |
| DIFF+IFN vs. Diff                 | Yes          | ****    | <0,0001          |

n=124

**EV1E**

left

| Tukey's multiple comparisons test | Significant? | Summary | Adjusted P Value |
|-----------------------------------|--------------|---------|------------------|
| FM vs. FM + IFN                   | No           | ns      | >0,9999          |
| FM vs. Diff                       | No           | ns      | 0,0694           |
| FM vs. DIF + IFN                  | Yes          | **      | 0,0057           |
| FM + IFN vs. Diff                 | Yes          | *       | 0,0407           |
| FM + IFN vs. DIF + IFN            | Yes          | **      | 0,0029           |
| Diff vs. DIF + IFN                | No           | ns      | 0,1816           |

n=3

**EV1E**

right

| Tukey's multiple comparisons test | Significant? | Summary | Adjusted P Value |
|-----------------------------------|--------------|---------|------------------|
| FM vs. FM+IFNg                    | No           | ns      | 0,6876           |
| FM vs. DIFF                       | Yes          | *       | 0,0158           |
| FM vs. DIFF+IFNg                  | No           | ns      | 0,499            |
| FM+IFNg vs. DIFF                  | No           | ns      | 0,0746           |
| FM+IFNg vs. DIFF+IFNg             | No           | ns      | 0,9852           |
| DIFF vs. DIFF+IFNg                | No           | ns      | 0,1208           |

n=3

**EV2F**

left

Unpaired t test

P value

P value summary

Significantly different (P &lt; 0.05)?

One- or two-tailed P value?

n=8

**EV2F**

right

Unpaired t test

P value

P value summary

Significantly different (P &lt; 0.05)?

One- or two-tailed P value?

n=8



**EV2E**

| Tukey's multiple comparisons test | Significant? | Summary | Adjusted P Value |
|-----------------------------------|--------------|---------|------------------|
| control vs. -WC                   | Yes          | ****    | <0,0001          |
| control vs. Infg 3d               | Yes          | ****    | <0,0001          |
| -WC vs. Infg 3d                   | No           | ns      | 0,7724           |

n=9

**EV3A**

|                                     |                |
|-------------------------------------|----------------|
| Unpaired t test                     |                |
| P value                             | <0,0001        |
| P value summary                     | ****           |
| Significantly different (P < 0.05)? | Yes            |
| One- or two-tailed P value?         | Two-tailed     |
| t, df                               | t=12,85, df=10 |

n=6

**EV4A**

|                                     |            |
|-------------------------------------|------------|
| ACE2                                |            |
| Unpaired t test                     |            |
| P value                             | 0,0027     |
| P value summary                     | **         |
| Significantly different (P < 0.05)? | Yes        |
| One- or two-tailed P value?         | Two-tailed |

n=7

|                                     |            |
|-------------------------------------|------------|
| KRT20                               |            |
| Unpaired t test                     |            |
| P value                             | 0,0028     |
| P value summary                     | **         |
| Significantly different (P < 0.05)? | Yes        |
| One- or two-tailed P value?         | Two-tailed |

n=7

|                                     |            |
|-------------------------------------|------------|
| CXCL11                              |            |
| Unpaired t test                     |            |
| P value                             | 0,0222     |
| P value summary                     | *          |
| Significantly different (P < 0.05)? | Yes        |
| One- or two-tailed P value?         | Two-tailed |

n=7

|                                     |            |        |
|-------------------------------------|------------|--------|
| IFIT3                               |            |        |
| Unpaired t test                     |            |        |
| P value                             |            | 0,0025 |
| P value summary                     | **         |        |
| Significantly different (P < 0.05)? | Yes        |        |
| One- or two-tailed P value?         | Two-tailed |        |
| n=7                                 |            |        |
